# Supplementary material
Source: publisher figshare collection journal article supplement (https://gsapubs.figshare.com/ndownloader/files/23293151)
Supplement: Supplementary file 1 [file 23293151]

**DATA REPOSITORY SECTION 1. PHOTOGRAPHS OF CENOZOIC STRATA**

Lithofacies 1, 1a, 2, and 3 are shown in Figure A1.

**DATA REPOSITORY SECTION 2. PRE-CENOZOIC BASIN FILL**

*Facies J1-grey slate pebble conglomerate interbedded with red mudstone-* Discontinuous outcrops of facies 1 floor the basin near the town of Yangqu (Figs. 2, 3). Facies J1 consists of dark red mudstone with grey lenses of pebble conglomerate. The conglomerate lenses exhibit angular-subangular slate clasts, and a quartz sand matrix. They display imbrication, and they are typically clast supported. The beds contain small, silty or fine sand lenses, that are ~3-4 centimeters thick and a 10 – 30 centimeters wide. Near the base of the unit, gravel lenses are 2-15 centimeters thick and laterally continuous over 1 – 3 meters. Upsection, the gravel beds amalgamate. The mudstone comprises silty clay, and the beds appear to be internally structureless. Beds are laterally continuous, 10 – 30 centimeters thick, and the sand lenses are inset into the muddy matrix. Although most of the beds are dark red, near the base of the unit, mud beds may be grey, buff or red.

The imbricated clasts within this unit are interpreted to be traction deposits. The lenticular geometry of the gravel beds indicates that facies J1 was deposited by a channelized flow. The red color of the mudstone may indicate subaerial exposure of muddy units, if the oxidation of the sediments is a primary feature. We interpret the beds to be fluvial-floodplain deposits, such that the gravel lenses are channel deposits and the mud beds are overbank deposits.

*Facies J2-grey, greenish grey, red and buff banded mudstone-* Facies 2 sits conformably atop facies J1. Like facies J1, it only outcrops in discontinuous patches in the southern part of

Gonghe basin, near the town of Yangqu (Figs. 2, 3). Facies J2 consists of bands of grey, greenish grey, tan, brown and maroon silty clay mudstone, interbedded with a few lenses of buff colored, fine-medium sandstone. The mud beds are tabular, and laterally continuous. Each is a few tens of centimeters to a few meters thick. They exhibit maroon or orange mottling. One ~0.8 m thick coal bed is present. Sandstone lenses exhibit planar parallel laminations, trough cross stratification and planar cross stratification. Sandstone beds are 0.1 – 0.5 m thick, and laterally continuous over tens of meters.

The fine grain size and lack of sedimentary structures of facies J2 indicate deposition in relatively still water. The green and grey color of the many of the muds suggests subaqueous deposition. The red muds suggest periods of subaerial exposure. Trough cross-stratification and lenticular geometry of the sandstone lenses indicates that they were deposited by a unidirectional, laterally confined current. We interpret these to be interbedded fluvial (red muds, sandstones lenses) and lacustrine (grey green massive muds) deposits.

In order to develop a chronology for J1 and J2 deposits, we collected pollen samples from a coal bed at the base of J2 deposits, found 74 m above the basin floor, and about 100 m below the Cenozoic section. The bed contains a rich, well-preserved pollen assemblage, with a relatively low diversity of species. Although many of the species are long-ranging, from the Jurassic to the Cretaceous, the abundant *Corollinas* and *Quadraeculina anellaeformis* indicate the basal deposits are Early Jurassic in age. The coordinates of the pollen sample site are 35.70496° N, 100.16672° E, 3099 m.

## **DATA REPOSITORY SECTION 3. COSMOGENIC BURIAL AGE DATING**

### **Field methods**

To constrain the burial age of fluvial sediment from the Tongde basin, we collected 5 new samples of coarse fluvial sand or gravel for analysis of in-situ, cosmogenically produced  $^{26}\text{Al}$  and  $^{10}\text{Be}$  inventories in quartz (Granger and Muzikar, 2001; Granger, 2006). 4 of these samples were derived from the Yellow River canyon immediately north of the Gonghe Nan Shan (sample locations shown in Figs. 2, A2, A3), and a 5th was collected ~20 km north of the range (Fig. 2). Because the concentrations of cosmogenic  $^{26}\text{Al}$  and  $^{10}\text{Be}$  are strongly dependent on the history of post-burial muogenic isotope production within ~10 m of the earth's surface, we targeted samples from the base of modern roadcuts (Fig. A2), where we are able to geometrically constrain sample depth prior to historic road construction. Sampled roadcut exposures are unweathered and clearly exhibit original sedimentary structures of the basin fill. As a result, we are confident that the samples remained in-situ since the time of their deposition and were only recently exposed in the roadcuts.

### **Laboratory techniques**

Samples were subjected to several physical and chemical treatments designed to purify the raw material to pure quartz. First, samples were crushed and sieved, in order to obtain a desirable grain size for the remaining treatments. In order to remove carbonates and minor metals, the crushed material was leached in nitric acid and aqua regia. Next, the sample was subjected to a suite of physical separation steps which were: froth flotation, magnetic separation, and following a purification bath in a hydrofluoric acid/nitric acid solution, heavy liquid separation. The remaining material was soaked for a second time in a hydrofluoric acid/nitric acid solution to remove any remaining feldspars. During this step, the outermost layers of the quartz grains were dissolved to remove meteoric  $^{10}\text{Be}$ . After completing this routine, Al concentrations were measured on an inductively coupled plasma optical emissions spectrometer

(ICP-OES) to assess the purity of the remaining quartz. If the measured Al concentration (which signifies the presence of residual feldspars) exceeded 200 ppm, the final step was repeated as necessary.

In order to extract Be and Al isotopes from the purified quartz samples, a second series of chemical treatments was applied. After adding Be and Al carriers, quartz was dissolved in concentrated hydrofluoric acid. Following dissolution, an Al aliquot was extracted from the solution and prepared for precise measurement on the ICP-OES. The volume of the solution containing the dissolved sample was reduced and the hydrofluoric acid was removed by a series of evaporation and fuming steps. The residual material was taken up in a sodium hydroxide solution, centrifuged, and decanted in order to separate Fe and Ti ions from the solid residual sample. Next the pH of the remaining solution was adjusted to ~8 to precipitate the Al and Be out of the solution as hydroxides (Ochs and Ivy-Ochs, 1997). After dissolving the remaining hydroxides in oxalic acid, cation and anion columns were used to remove residual Na, Fe, and other undesired ions, and to isolate Be and Al. The samples were dried and fired in an oven, and then loaded into a cathode for accelerator mass spectrometry (AMS). AMS was conducted at PRIME lab at Purdue University, following standard protocols.

### **Modeling of burial ages**

For buried sediment that is derived from a steadily eroding source, the concentrations of unstable cosmogenic isotopes (in this case,  $^{26}\text{Al}$  and  $^{10}\text{Be}$ ) will evolve through time as a function of two unknown variables, the pre-burial cosmogenic inventory and the time since burial (Granger and Muzikar, 2001).

$$(1)N_{Al}(t) = N_{Al}(0)e^{(-t/\tau_{Al})} + P_{Al}(d)\tau_{Al}(1 - e^{-t/\tau_{Al}})$$

$$(2)N_{Be}(t) = N_{Be}(0)e^{(-t/\tau_{Be})} + P_{Be}(d)\tau_{Be}(1 - e^{-t/\tau_{Be}})$$

where  $N_{Al}$  is the number of  $^{26}\text{Al}$  atoms  $\text{gram}^{-1}$  of quartz,  $N_{Be}$  is the number  $^{10}\text{Be}$  atoms  $\text{gram}^{-1}$  of quartz,  $t$  is time in years,  $P_{Al}$  is production rate of cosmogenic  $^{26}\text{Al}$  in atoms  $\text{year}^{-1}\text{gram}^{-1}$  of quartz,  $P_{Be}$  is the production rate of cosmogenic  $^{10}\text{Be}$  in atoms  $\text{year}^{-1}\text{gram}^{-1}$  of quartz,  $d$  is depth in cm,  $\tau_{Al}$  is the radioactive mean-life of  $^{26}\text{Al}$  ( $1.02 * 10^6\text{yr}$ ) (Norris et al., 1983), and  $\tau_{Be}$  is the radioactive mean-life of  $^{10}\text{Be}$  ( $1.93 * 10^6\text{yr}$ ) (Nishiizumi et al., 2007). The first term on the right hand side of (1) and (2) describes the post-burial decay of the isotopes and the second term describes the post-burial production of cosmogenic isotopes. For sediment that is buried to a sufficient depth, a few tens of meters, the second terms in (1) and (2) may be considered negligible, however, post-burial production significantly contributes to the inventory of cosmogenic isotopes in shallowly buried sediment (Granger and Smith, 2000; Granger and Muzikar, 2001; Wolkowinsky and Granger, 2004).

Under the assumption that a sample acquired its pre-burial inventory of cosmogenic isotopes as it was advected to the surface of a steadily eroding landscape, the initial concentration of a given cosmogenic isotope will simply be a function of the erosion rate.

$$(3)N_{Al}(0) = \frac{A_0}{\frac{1}{\tau_{Al}} + \frac{E}{L_0}} + \frac{A_1}{\frac{1}{\tau_{Al}} + \frac{E}{L_1}} + \frac{A_2}{\frac{1}{\tau_{Al}} + \frac{E}{L_2}} + \frac{A_3}{\frac{1}{\tau_{Al}} + \frac{E}{L_3}}$$

$$(4)N_{Be}(0) = \frac{B_0}{\frac{1}{\tau_{Be}} + \frac{E}{L_0}} + \frac{B_1}{\frac{1}{\tau_{Be}} + \frac{E}{L_1}} + \frac{B_2}{\frac{1}{\tau_{Be}} + \frac{E}{L_2}} + \frac{B_3}{\frac{1}{\tau_{Be}} + \frac{E}{L_3}}$$

Where  $E$  is erosion rate ( $\text{cm yr}^{-1}$ ) and  $L_j$  refers to the attenuation length for a cosmogenic isotope production reaction ( $\text{cm g cm}^{-3}$ ).  $L_0$  is the attenuation length for spallogenic production reactions;  $L_1$  and  $L_2$  are the attenuation lengths for negative muon capture production reactions; and  $L_3$  is the attenuation length for fast muon production reactions. We assign values of  $L_0 = 160/\rho$ ,  $L_1 = 738/\rho$ ,  $L_2 = 2688/\rho$ , and  $L_3 = 4360/\rho$ , where  $\rho$  is the density of the rock covering the sample in  $\text{g cm}^{-3}$  (Granger and Muzikar, 2001). We assume that prior to erosion, the target minerals were covered by rocks with a density of  $2.6 \text{ g cm}^{-3}$  (equations 3 and 4), and after burial, the target minerals were covered by sediment with a density of  $2.0 \text{ g cm}^{-3}$  (equations 5 and 6). The other constants,  $A_j$  and  $B_j$ , describe production rates for the various production reactions and have units of  $\text{atoms year}^{-1} \text{ gram}^{-1}$  of quartz. We assign sea level high latitude values of  $A_0 = 30$ ,  $A_1 = 0.72$ ,  $A_2 = 0.16$ ,  $A_3 = 0.19$  (Granger and Muzikar, 2001 and references therein), such that the integrated sea level high latitude production rate of  $^{26}\text{Al}$  is  $31.07 \text{ atoms year}^{-1} \text{ gram}^{-1}$  of quartz. Previous investigators have estimated that the various production rate coefficients for  $^{10}\text{Be}$  are  $B_0 = 5$ ,  $B_1 = 0.09$ ,  $B_2 = 0.02$ , and  $B_3 = 0.02$  (Granger and Muzikar, 2001, and references therein). In aggregate, these values suggest a sea level high latitude  $^{10}\text{Be}$  production rate of  $5.13 \text{ atoms year}^{-1} \text{ gram}^{-1}$  of quartz. However, recent revision to the mean life of  $^{10}\text{Be}$  (Nishiizumi et al., 2007), suggests that the production rate is slightly less,  $\sim 4.76 \text{ atoms year}^{-1} \text{ gram}^{-1}$  of quartz. Following this revision, we scale each of the  $^{10}\text{Be}$  production rate coefficients by a factor of  $4.76/5.13$  so that the aggregate production rate conforms to the more recent value. As such, we use  $^{10}\text{Be}$  coefficients of  $B_0 = 4.64$ ,  $B_1 = 0.08$ ,  $B_2 = 0.02$ , and  $B_3 = 0.02$ . This adjustment primarily affects the spallogenic production rate,  $B_0$ , and has little to no effect on the various muon production reaction rates. The values of  $A_j$  and  $B_j$ , were scaled to the field area using a latitude and altitude

dependent correction for spallogenic production, and an atmospheric pressure dependent correction for all muogenic production reactions (Stone, 2000). We note that the production rates and atmospheric pressure scaling for fast muon reactions remain uncertain (Braucher et al., 2003; Wolkowinsky and Granger, 2004), but because the fast muon terms are small, we neglect any uncertainty that they introduce into our calculations.

For sediment that has not been buried to a sufficient depth to be completely shielded from cosmogenic radiation, post-burial production is described by the following relationships:

$$(5)P_{Al}(d) = A_0e^{-d/L_0} + A_1e^{-d/L_1} + A_2e^{-d/L_2} + A_3e^{-d/L_3}$$

$$(6)P_{Be}(d) = B_0e^{-d/L_0} + B_1e^{-d/L_1} + B_2e^{-d/L_2} + B_3e^{-d/L_3}$$

If the present day concentration of  $^{26}\text{Al}$  and  $^{10}\text{Be}$  is measured, and the burial depth is measured, then equations (1)-(6) can be combined to form a system of two equations with two unknowns,  $t$  and  $E$ . The equations may be solved graphically, or numerically. We present a graphical solution for these equations in Figure 6, but in practice, we have solved the equations numerically. This was done by forward modeling the range of possible combinations of  $t$  and  $E$ , and then identifying the  $t$  and  $E$  pair that best reproduces the modern day  $^{26}\text{Al}/^{10}\text{Be}$  ratio and  $^{10}\text{Be}$  concentration in a least squares sense (Fig. A4). We report  $1\sigma$  uncertainties on each burial age.

Our calculations rely on three simplifying assumptions. First, we scale production rates of  $^{26}\text{Al}$  and  $^{10}\text{Be}$  to the sea level high latitude values using the present-day latitude and altitude of the samples. Because the quartz sand in each of the samples was eroded in a different location than it was deposited, this assumption introduces some error into our calculations. Second, we

assume that analytical uncertainties on the concentrations of  $^{26}\text{Al}$  and  $^{10}\text{Be}$  encompass any uncertainties in the production rates and mean-lives of the isotopes. Third, we assume that post-burial muogenic isotope production is best calculated on the basis of the stratigraphic depth of each sample. Due to the fact that basin excavation appears to be recent and gradual, initiating at  $\sim 0.5$  Ma and proceeding at vertical incision rates of  $\sim 100$  m/Ma (Craddock et al., 2010), we make the simplifying assumption that post-excavation muogenic production along the evolving hillslope does not contribute significantly to measured cosmogenic inventories (c.f., Davis et al., 2011). This assumption should be particularly robust for samples with relatively high stratigraphic depths, because they were exhumed relatively recently. Moreover, vertical incision rates do not capture rates of canyon widening via retreat of angle of repose hillslopes and are likely to overestimate the rate at which our samples were excavated to shallow, pre-roadcut configurations. Recent application of burial age dating to correlative L3 deposits in central Tongde basin provides some evidence that our third assumption is reasonable (Craddock et al., 2010). Consideration of various burial and exhumation scenarios showed that muogenic production following basin excavation by the Yellow River at 0.5 Ma would, at maximum, increase observed burial ages by  $\sim 30\%$ , but only if basin excavation was instantaneous and only for shallowly-buried ( $\sim 15$  m) samples (Craddock et al., 2010). For samples buried more deeply, and for slower rates of downcutting along the Yellow River, post-burial production due to muons will be less. In light of this sensitivity analysis, we estimate that our calculated burial ages are subject to  $\sim 15\%$  uncertainty, which is within the analytical uncertainty on the calculations.

In order to compare the  $^{26}\text{Al}/^{10}\text{Be}$  ratio and  $^{10}\text{Be}$  concentration between sites, the abscissa in Figure 6 is normalized by the product of the  $^{10}\text{Be}$  production rate at sea level and high latitude and the inverse of the local production rate (Granger, 2006). Solid curves represent  $^{26}\text{Al}$  and  $^{10}\text{Be}$



concentrations for various burial times (e.g. 1 Ma, 2 Ma, etc.). These contours are calculated assuming no post-burial production of muons, such that our calculated burial ages deviate slightly from these contours. It can be seen from the zero burial age curve that  $^{26}\text{Al}$  and  $^{10}\text{Be}$  are produced at a ratio of  $\sim 6.3$ , which is simply the ratio of  $P_{Al}$  to  $P_{Be}$ . Prior to transport, deposition, and burial, samples are eroded to earth's surface at some unknown rate. The sub-vertical, stippled lines represent the burial history for samples with various inherited erosion rates/cosmogenic inventories. The dashed curve represents  $^{26}\text{Al}$  and  $^{10}\text{Be}$  concentrations for samples experiencing constant exposure at earth's surface. Because unstable cosmogenic isotopes tend towards a secular equilibrium, there is a finite limit to the  $^{10}\text{Be}$  concentration, which is located on the far right hand side of the burial time = 0 curves.

## **DATA REPOSITORY SECTION 4. PALEOMAGNETICS**

### **Field methods**

For both sections, 3-4 specimens were collected from each bed, using a gas-powered drill with a 2.5 cm diameter core bit. The core-plate orientation was measured using a magnetic compass. Bedding dip of sites was also measured using a magnetic compass. In certain stratigraphic intervals, the sediment was too friable to be sampled with a drill. At these sites, oriented block samples  $\sim 2\text{ cm}^3$  in volume, were collected. These samples were carved into smaller cores in the laboratory.

### **Laboratory techniques**

Magnetic and thermal cleaning was conducted at The California Institute of Technology. Magnetization was measured using a three-axis DCSQUID moment magnetometer in a magnetically shielded  $\mu$ -metal room (Kirschvink et al., 2008). The background noise of the

magnetometer is  $<1 \text{ pA m}^2$ . It is equipped with a vacuum pick and put, computer-controlled sample changing system. After measuring the natural remnant magnetism of each specimen, most samples were subjected to up to 20 steps of alternating field (AF) and thermal (TT) demagnetization. Five or six evenly spaced AF steps, between 0 and 100 or 120 gauss were first applied in order to remove low coercivity viscous remnant magnetization (VRM). AF demagnetization was conducted with a computer-controlled, three-axis coil system. Following that, thermal steps at 70, 150, 250, 350, 450, 500, 530, 555, 570, 600, 635, 655, 670, and 680 °C were applied. Thermal demagnetization was conducted with a commercially built, magnetically shielded furnace. The treatment was designed to have a high density of steps leading up to the unblocking temperatures of magnetite and hematite (570 and 680 °C, respectively). For the lower section, 238 specimens were demagnetized, one from each of the 218 sites, and duplicate specimens from 20 sites. The duplicate measurements were made in order to obtain a higher density of thermal steps for sites with overlapping characteristic remnant magnetization (ChRM) and VRM (see below). For these samples, we implemented thermal steps at 70, 100, 120, 150, 190, 230, 260, 290, 320, 350, 425, 500, 530, 550, 560, 570, 615, and 665 °C. If the magnetization measurement following an AF or TT step yielded a circular standard deviation (CSD) of  $>15^\circ$ , the measurement was repeated up to two times. If a CSD of  $\leq 15^\circ$  could not be obtained, the data for the AF/TT step were discarded.

Low temperature/coercivity component and high temperature component directions were determined using a least-squares fit, principal component analysis (Kirschvink, 1980; Jones, 2002). In general, we sought to perform the least squares, principal component analysis on  $\geq 4$  TT/AF steps. Commonly, more steps were incorporated, however, in a few cases, only three TT/AF steps were used. For magnetization components that were believed to be characteristic,

regression included the origin and were forced through the origin. We consider mean angular deviations for a regression that exceed 15 to indicate a poor quality regression, although this did not apply to any of our interpretable samples. Although some authors filter data with VGP latitudes of  $<30^\circ$  (19 sites in the lower section), we choose not to do so simply because our magnetostratigraphy is unaffected by applying this filter. If brief polarity reversals occurred where segments overlapped, the stratigraphic height of specimens from a segment was adjusted in order to eliminate reversals. This correction was applied to six samples, four of which were corrected by  $<2$  m and two of which were corrected by  $\sim 6 - 7$  m. In order to apply this correction, the slight adjustment in height was forbidden if it altered the stratigraphic order of samples within a single stratigraphic segment. Because some stratigraphic intervals were only sparsely sampled, we did not reject single site reversals, although this filter is sometimes applied to other magnetostratigraphic data. After determining the orientation of the ChRM (the highest stability component of magnetization) for each sample, the declination and inclination were used to calculate the VGP position. Northern hemisphere poles were assigned normal polarity and southern hemisphere poles were assigned reversed polarity.

A small number of samples were subjected to a full battery of rock magnetic experiments. First, the NRM of samples was removed in alternating fields up to 1000 G. Subsequently, isothermal viscous remnant magnetizations (IRM) and anhysteretic remnant magnetizations (ARM) were imparted and removed by IRM backfields and/or by AF cleaning.

### **Rock Magnetism**

We divide our paleomagnetic specimens into three categories, which reflect the magnetic mineralogy of the specimens.

For many specimens (Type 1), hematite appears to be the dominant carrier of the highest stability (characteristic) component of the NRM (abbreviated ChRM hereafter) (Fig. A5). Although alternating fields of up to 1T are insufficient to remove the NRM of all of the specimens, these specimens preserved a relatively high percentage of their NRM during AF demagnetization (e.g. specimen 509.1, Fig. A5). Likewise, these samples do not reach saturation during isothermal remnant magnetism (IRM) acquisition up to 1000 G. In general, inability to clean the NRM in high alternating fields indicates the presence of antiferromagnetic minerals, such as hematite or goethite, thereby restricting the possible magnetic mineralogy of these specimens (see Lowrie, 1990 and references therein). For these specimens, the magnitude of the NRM was not appreciably diminished by AF steps up to 126 G followed by thermal steps up to 570 (e.g. specimen 509.1, Fig. A5). Magnetization was abruptly removed between TT steps 570 to 680 °C. Given that goethite has an unblocking temperature of ~80 - 120° C and hematite has an unblocking temperature of ~675° C (Lowrie, 1990 and references therein), hematite is most likely to carry the ChRM. Commonly, these specimens display stable magnetization directions on Zjiderfeld and equal area plots to thermal steps between 570 and 680 °C. Moreover, a low stability component of NRM is typically removed at low AF steps (below 126 G) or sometimes low temperature steps (70 - 150 °C), suggesting that the overprint is carried by low coercivity magnetic minerals, such as magnetite, titanomagnetite, maghemite, and/or goethite. For a subset of Type 1 specimens, the magnetization appears to be carried primarily by magnetite, rather than hematite (specimen 918.1, Fig. A5). Compared to the specimens described above, AF demagnetization up to 126 G removes a relatively high proportion of the NRM, and the specimens tend to show that a high percentage of the NRM is removed between 500 and 570 °C, immediately below the unblocking temperature of magnetite (580 °C). Furthermore, the

specimens often exhibit unstable behavior above thermal steps of 555-570 °C. Similar to other type 1 specimens, alternating fields of 60-100 mT or temperatures of 70-150 °C typically remove a viscous overprint from these samples, suggesting that low coercivity minerals, such as magnetite and/or goethite carry the viscous remnant magnetism (VRM).

The ChRM of a second type of specimens (Type 2) appears to be carried by titanomagnetite and/or maghemite (Fig. A5). These samples exhibit much lower coercivities during AF demagnetization in fields up to 1T and during IRM acquisition in fields up to 1T, suggesting a relatively low proportion of antiferromagnetic minerals (e.g. sample 702, Fig. A5). During thermal demagnetization, these specimens exhibit a pronounced drop in magnetization at ~200 – 350 °C (Fig. 7), which is similar to the maximum unblocking temperature of titanomagnetite and maghemite (~350° C). Often, this type of specimen displays unstable demagnetization behavior at thermal steps at or above 200 - 350 °C (e.g. sample 702, Fig. 7), suggesting that minerals with relatively high unblocking temperatures, such as magnetite and/or hematite, do not carry the ChRM. Importantly, this type of sample exhibits a pronounced drop in the NRM at low AF levels, indicating that the minerals that carry the ChRM also carry a viscous overprint. Therefore, the stability spectrum of the VRM partially or completely overlaps the ChRM. In light of this observation, the ChRM of type 2 specimens, which exhibit overlapping VRM and ChRM stability spectra, was determined using the magnetization circle method described by McFadden and McIlhenny (1988).

We did not attempt to interpret the polarity for a small subset of specimens (Type 3) for two reasons. 1) The stepwise demagnetization behavior for a few sites was too erratic to interpret for some sites. 2) The magnetic inclination and the magnetic declination suggested opposing polarities for some sites.

To more closely examine the demagnetization behavior of samples exhibiting with similar, or completely overlapping, stability spectra for the ChRM and the VRM, we conducted an additional set of thermal demagnetization experiments on duplicate specimens, with a high concentration of thermal steps between 70 and 350 degrees. Every one of these samples indicates 1) stable, interpretable magnetization directions below 200 - 350 °C, 2) a sharp drop in magnetization around 350 °C, and 3) unstable directions above 200 - 350°C (see specimen 702.4, Fig. A5). The clear demagnetization behavior of these samples substantiates our inference that the ChRM of these specimens is carried by titanomagnetite and/or maghemite, and that the stability spectra of the ChRM and VRM should overlap for these samples. Moreover, all sites with duplicate specimens yielded consistent polarity directions, suggesting that our polarity determinations are robust.

Figure A6 shows the end-member NRM-removal and IRM-acquisition behaviors in alternating fields for samples subjected to the full battery of rock magnetic experiments. Samples that retain a relatively high proportion of NRM in an alternating field, and that develop a relatively small IRM during IRM acquisition are interpreted to have a high proportion of hematite.

### **Sample information**

Tables A1 and A2 show latitude, longitude, elevation, stratigraphic height and characteristic remnant magnetization information for each sample.

### **REFERENCES**

Braucher, R., Brown, E. T., Bourles, D. L., and Colin, F., 2003, In situ produced  $^{10}\text{Be}$  measurements at great depths: implications for production rates by fast muons: Earth and

- Planetary Science Letters, v. 211, no. 3-4, p. 251-258.
- Craddock, W. H., Kirby, E., Harkins, N., Zhang, H., Shi, X., and Liu, J., 2010, Rapid fluvial incision along the Yellow River during headward basin integration: *Nature Geoscience*, v. 3, p. 209-213, doi: 10.1038/NGEO777.
- Davis, M., Matmon, A., Fink, D., Ron, H., and Niedermann, S., 2011, Dating Pliocene lacustrine sediments in the central Jordan valley, Israel - Implications for cosmogenic burial dating: *Earth and Planetary Science Letters*, v. 305, p. 317-327, doi:10.1016/j.epsl.2011.03.003.
- Granger, D. E., 2006, A review of burial dating methods using  $^{10}\text{Be}$  and  $^{26}\text{Al}$ , in Siame, L. L., Bourles, D. L., and Brown, E. T., eds., *In situ-Produced Cosmogenic Nuclides and Quantification of Geological Processes*: Boulder, CO, Geological Society of America, p. 1-16.
- Granger, D. E., and Muzikar, P. F., 2001, Dating sediment burial with in situ-produced cosmogenic nuclides: theory, techniques, and limitations: *Earth and Planetary Science Letters*, v. 188, no. 1-2, p. 269-281, doi:10.1016/S0012-821X(01)00309-0.
- Granger, D. E., and Smith, A. L., 2000, Dating buried sediments using radioactive decay and muonogenic production of  $^{26}\text{Al}$  and  $^{10}\text{Be}$ : *Nuclear Instruments and Methods in Physics Research Section B: Beam Interactions with Materials and Atoms*, v. 172, no. 1-4, p. 822-826.
- Jones, C. H., 2002, User-driven integrated software live: "PaleoMag" paleomagnetism analysis on the Macintosh: *Computers and Geosciences*, v. 28, no. 10, p. 1145-1151.
- Kirschvink, J. L., 1980, The least-squares line and plane and the analysis of palaeomagnetic data: *Geophysical Journal of the Royal Astronomical Society*, v. 62, no. 3, p. 699-718.
- Kirschvink, J. L., Kopp, R. E., Raub, T. D., Baumgartner, C. T., and Holt, J. W., 2008, Rapid,

- precise, and high-sensitivity acquisition of paleomagnetic and rock-magnetic data: Development of a low-noise automatic sample changing system for superconducting rock magnetometers: *Geochemistry, geophysics, geosystems*, v. 9, no. Q05Y01, doi: 10.1029/2007GC001856.
- Lowrie, W., 1990, Identification of ferromagnetic minerals in a rock by coercivity and unblocking temperature properties: *Geophysical Research Letters*, v. 17, no. 2, p. 159 – 162.
- McFadden, P. W., and McElhinny, M. W., 1988, The combined analysis of remagnetization circles and direct observations in paleomagnetism: *Earth and Planetary Science Letters*, v. 87, no. 1-2, p. 161-172, doi: 10.1016/0012-821X(88)90072-6.
- Nishiizumi, K., Imamura, M., and Caffee, M. W., 2007, Absolute calibration of  $^{10}\text{Be}$  AMS standards: *Nuclear Instruments and Methods in Physics Research Section B: Beam Interactions with Materials and Atoms*, v. 258, no. 2, p. 403-413,
- Norris, T. L., Gancarz, A. J., Rokop, D. J., and Thomas, K. W., 1983, Half-life of  $^{26}\text{Al}$ : *Proceedings of the Fourteenth Lunar and Planetary Science Conference, Part 1, Journal of Geophysical Research*, v. 88, p. B331-B333.
- Ochs, M., and Ivy-Ochs, S., 1997, The chemical behavior of Be, Al, Fe, Ca, and Mg during AMS target preparation from terrestrial silicates modeled with chemical speciation calculations: *Nuclear Instruments and Methods in Physics Research Section B: Beam Interactions with Materials and Atoms*, v. 123, no. 1-4, p. 235-240,
- Stone, J. O., 2000, Air pressure and cosmogenic isotope production: *Journal of Geophysical Research Solid Earth*, v. 105, no. B10, p. 23,753-23,759.
- Wolkowinsky, A. J., and Granger, D. E., 2004, Early Pleistocene incision of the San Juan River,



Utah, dated with  $^{26}\text{Al}$  and  $^{10}\text{Be}$ : *Geology*, v. 32, no. 9, p. 749-752, 10.1130/G20541.1.

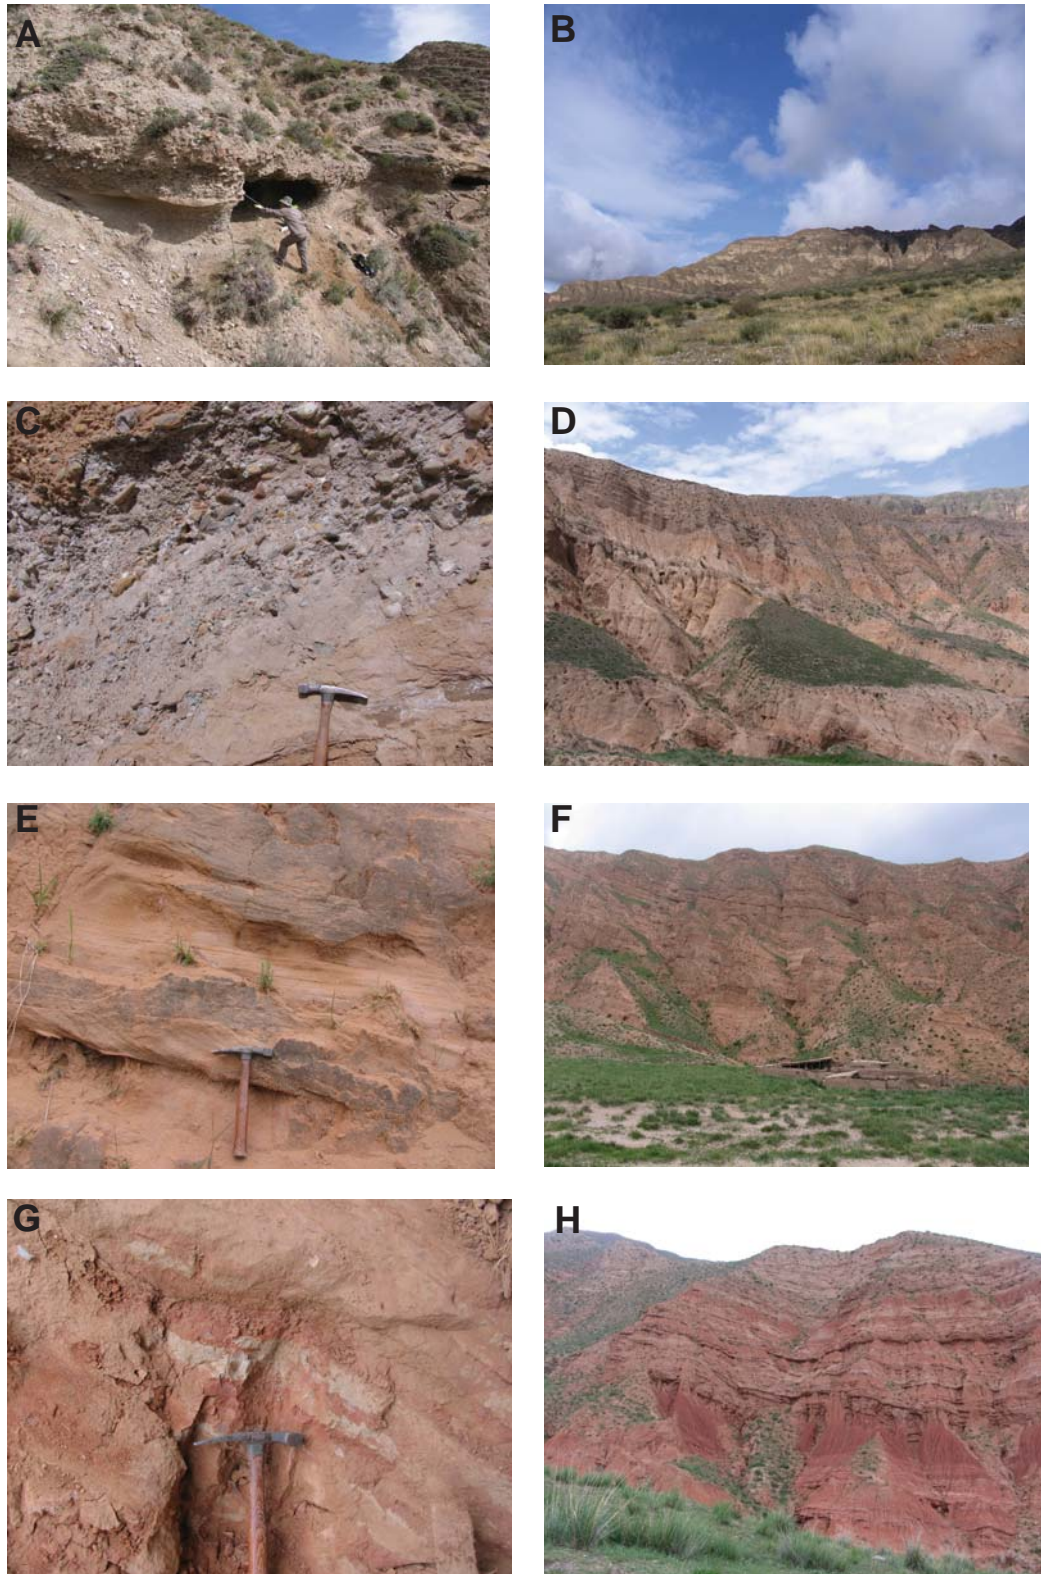

Figure A1. Stratigraphic units in lower levels of southern Gonghe subbasin. (A), (B) Lithostratigraphic unit 3. (C),(D) Lithostratigraphic unit 2. (E), (F) Lithostratigraphic unit 1a. (G), (H) Lithostratigraphic unit 1. Cliffs in (D), (F), and (H) are on the order of ~200 m high.

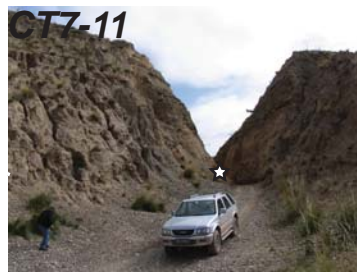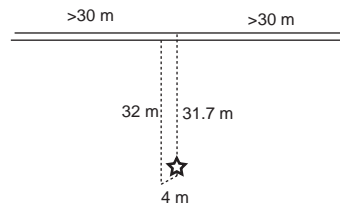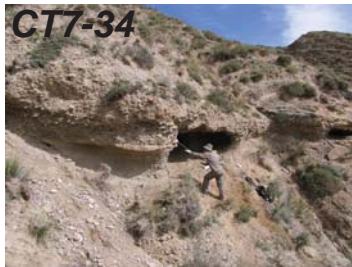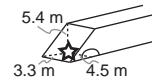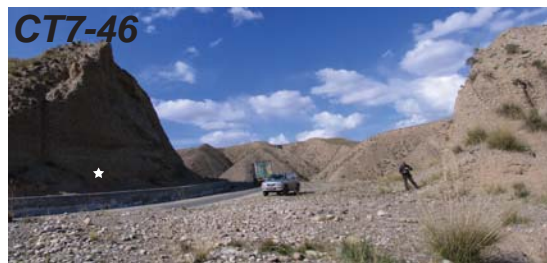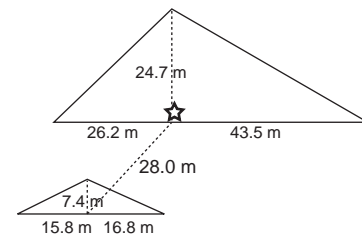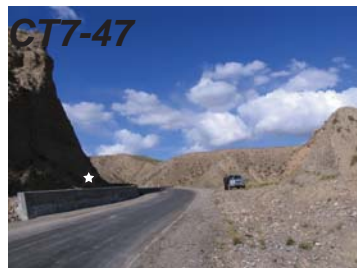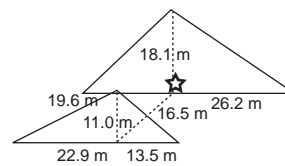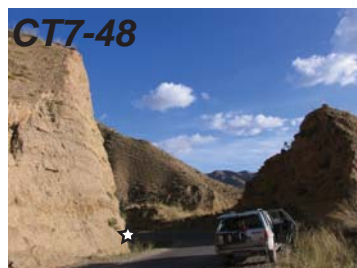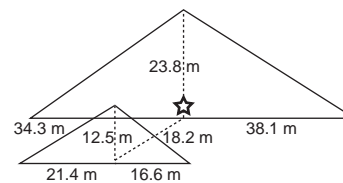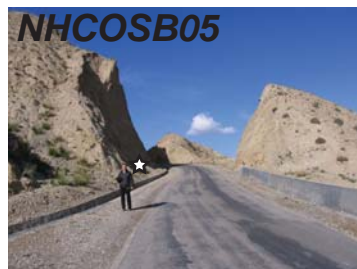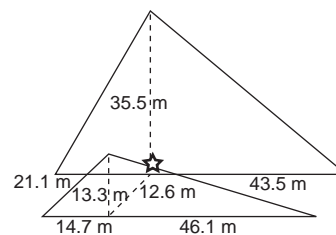

Figure A2. Cosmogenic burial age sample sites. Sample locations marked with open stars.

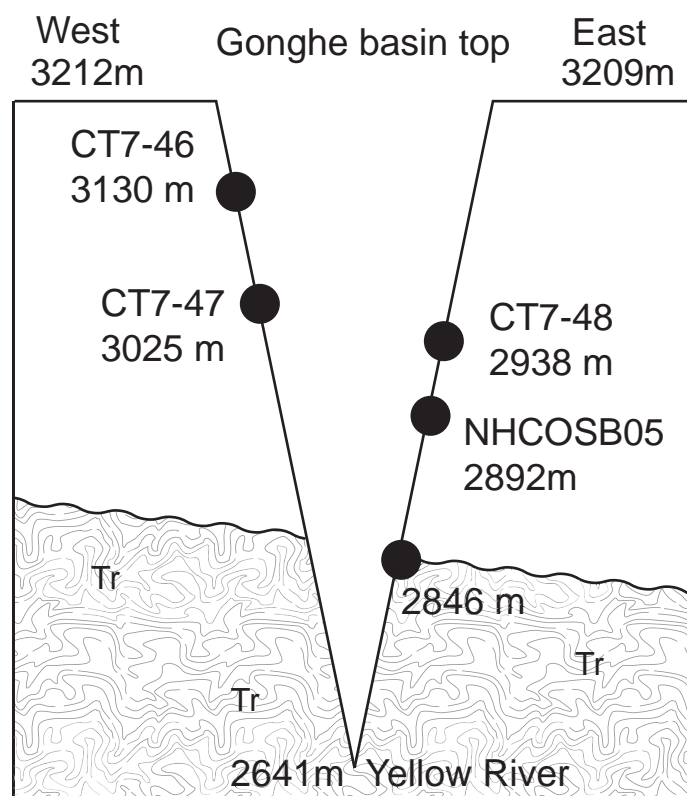

Figure A3. Schematic diagram showing depth of L3 burial age samples.

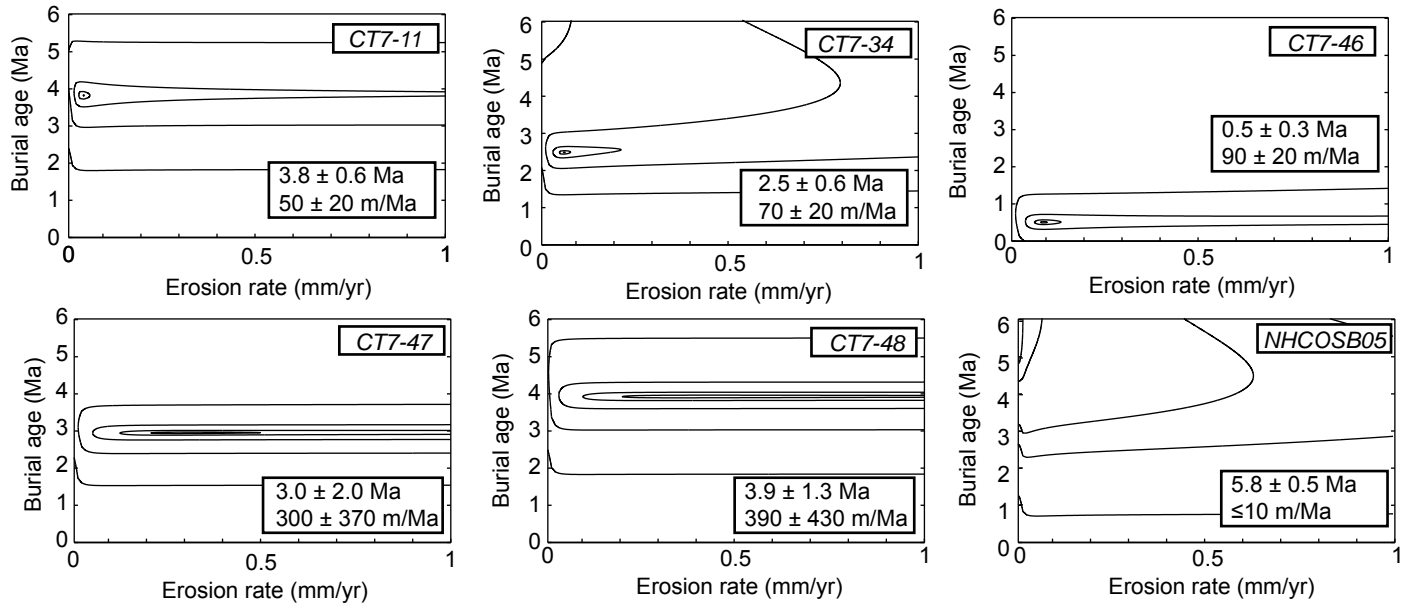

Figure A4. Contour plots of chi-squared statistics for combinations of burial age and erosion rate. Both burial age and erosion rate misfits are normalized such that an error of 1 is the largest error for a model iteration. Each contour represents a 1-order of magnitude decrease in the size of the chi squared statistic. In the NHCOSB05 plot, each contour represents a half-order of magnitude decrease in the chi squared statistic.

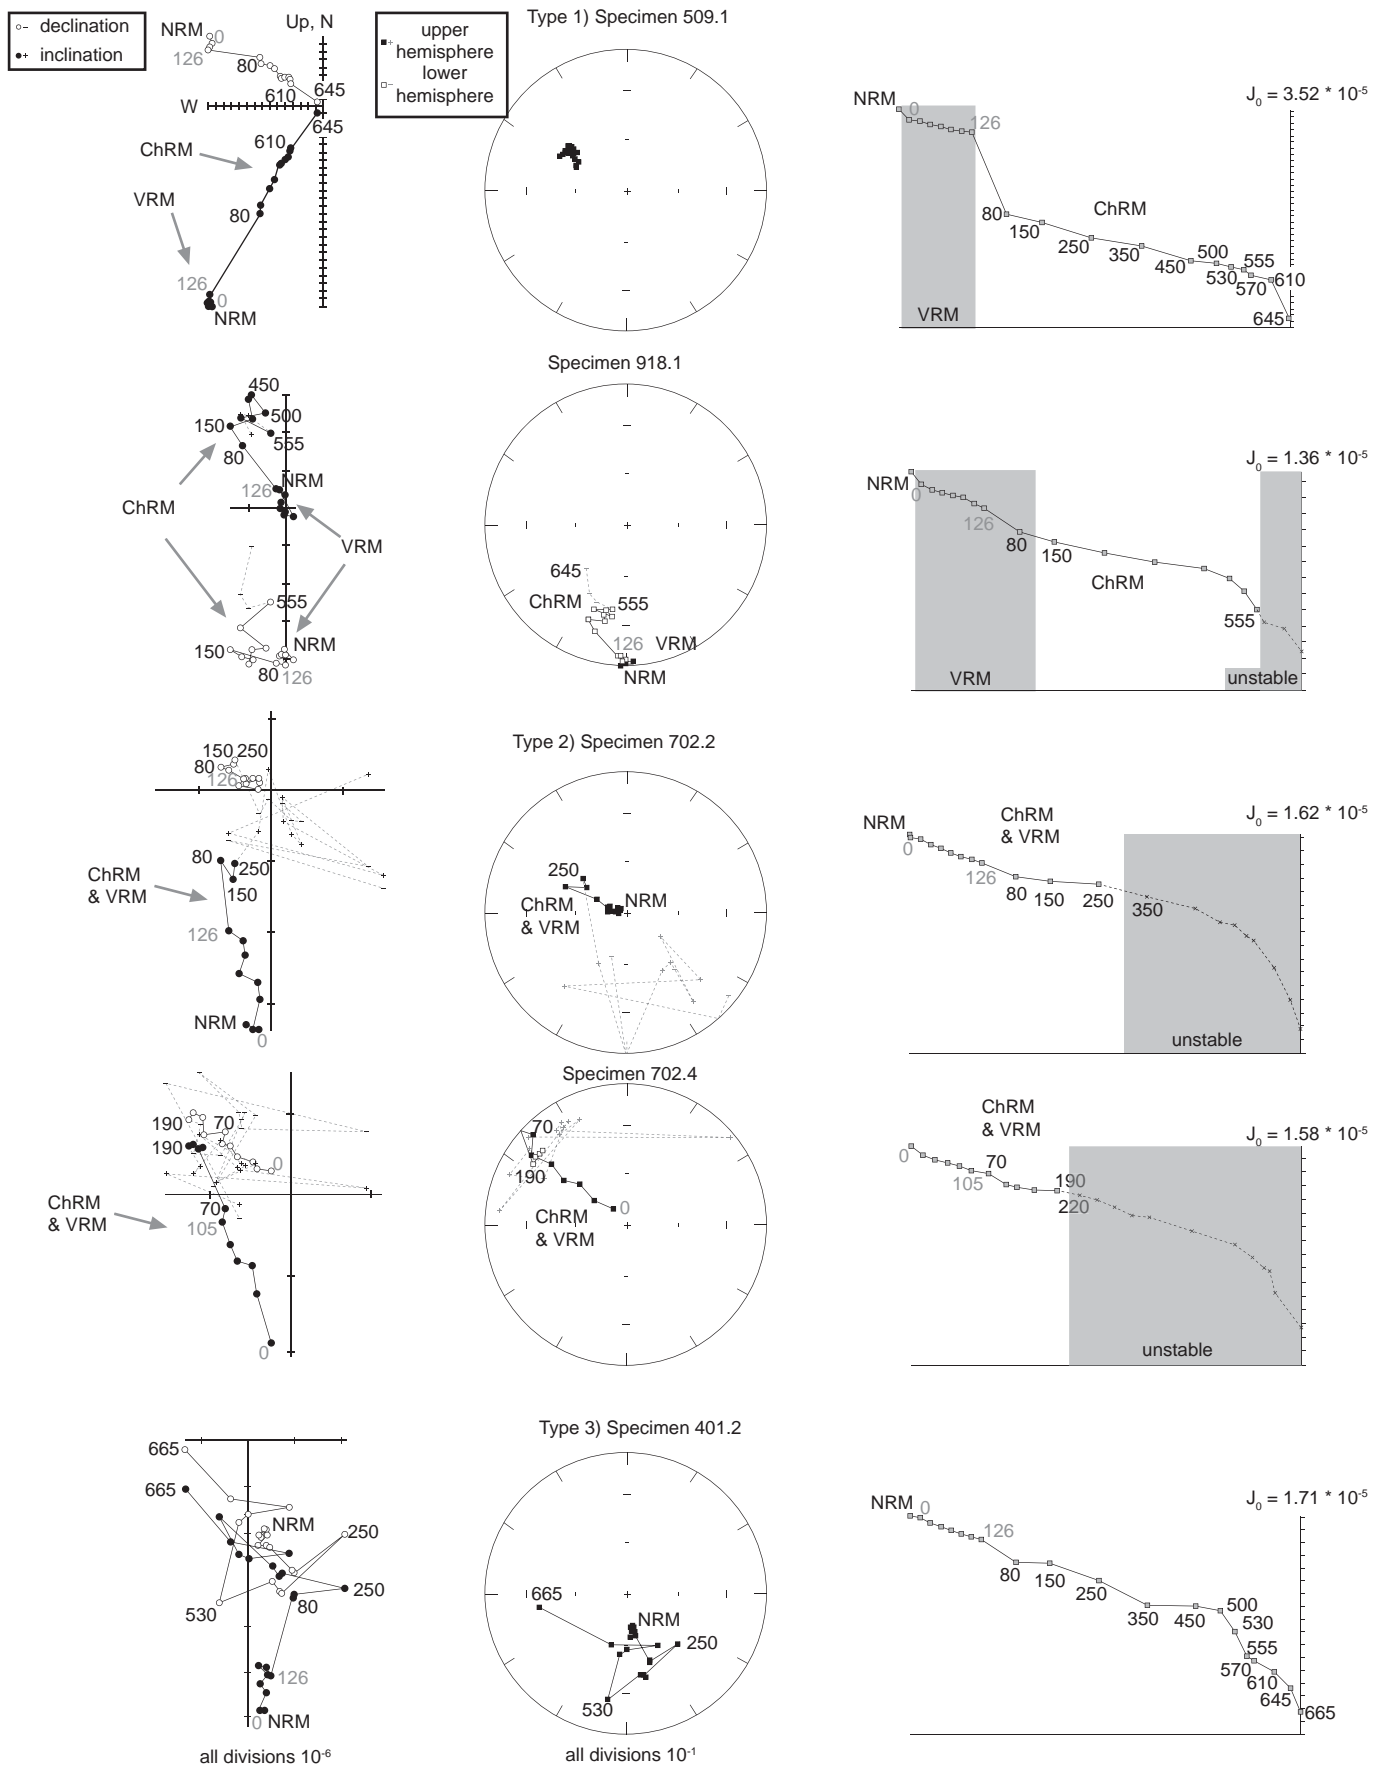

Figure A5. Example orthogonal vector, equal area, and magnetization intensity plots for representative samples from the southern Gonghe stratigraphic sections.

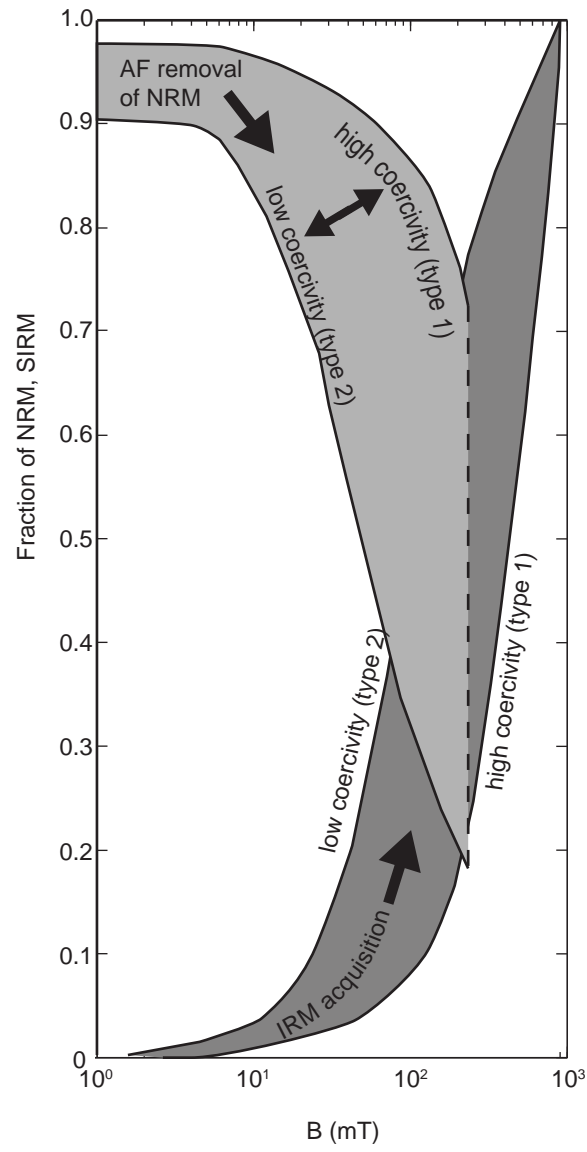

Figure A6. Alternating field removal of NRM and IRM acquisition curves. Y-axis represents the proportion of the total NRM, or the Saturation IRM, respectively.



TABLE A1. SUPPLEMENTARY PALEOMAGNETIC INFORMATION-LOWER SECTION

| Sample | Latitude<br>(°) | Longitude<br>(°) | Elevation<br>(m) | Type | Dec. (g) | Inc. (g) | Dec. (t) | Inc. (t) | N  | MAD  | Stratigraphic<br>Height (m) | Declination | VGP<br>Latitude (°) |
|--------|-----------------|------------------|------------------|------|----------|----------|----------|----------|----|------|-----------------------------|-------------|---------------------|
| 101.2  | 35.70599        | 100.16951        | 3062             | ChR  | 286.9    | 62.1     | 359.7    | 58.1     | 7  | 1.9  | 169.3                       | -0.3        | 86                  |
| 102.2  | 35.70596        | 100.16959        | 3056             | Cir  | 85.8     | -69.1    | 36.8     | -88      | 12 | 90   | 173.2                       | 36.8        | -32                 |
| 103.1  | 35.7059         | 100.16946        | 3105             | ChR  | 291.3    | 41.4     | 329.9    | 47.2     | 5  | 4.9  | 176.1                       | -30.1       | 64                  |
| 104.3  | 35.70568        | 100.1693         | 3096             | ChR  | 279.7    | 51.6     | 338.3    | 59.1     | 5  | 2.8  | 179.7                       | -21.7       | 72                  |
| 105.3  | 35.70617        | 100.16956        | 3068             | ChR  | 344.6    | 37.1     | 0.6      | 15.2     | 4  | 6    | 182.6                       | 0.6         | 63                  |
| 106.1  | 35.70617        | 100.16956        | 3071             | ChR  | 310.8    | 59.2     | 1.6      | 46.2     | 9  | 2.5  | 187.6                       | 1.6         | 82                  |
| 107.2  | 35.7063         | 100.16938        | 3083             | ChR  | 265      | 46.7     | 321.6    | 67.2     | 9  | 4.1  | 192.9                       | -38.4       | 58                  |
| 108.3  | 35.70635        | 100.16956        | 3083             | ChR  | 255.6    | 60.9     | 10.8     | 74.5     | 10 | 2.1  | 199.6                       | 10.8        | 63                  |
| 109.3  | 35.70634        | 100.16957        | 3083             | ChR  | 290.4    | 59.8     | 2.4      | 59       | 4  | 3.4  | 204.1                       | 2.4         | 85                  |
| 110.1  | 35.70631        | 100.16955        | 3125             | ChR  | 258.7    | 61.1     | 13.3     | 75.1     | 4  | 9.2  | 209                         | 13.3        | 62                  |
| 112.3  | 35.70646        | 100.16923        | 3080             | Cir  | 121.9    | -47.1    | 165.7    | -47.8    | 11 | 12.3 | 215.4                       | 165.7       | -76                 |
| 113.3  | 35.70654        | 100.16933        | 3084             | Cir  | 94.8     | -50.1    | 143.8    | -61.2    | 10 | 22.2 | 219.5                       | 143.8       | -61                 |
| 114.1  | 35.70656        | 100.16921        | 3112             | ChR  | 275.7    | 55.5     | 353      | 71.6     | 6  | 2.6  | 223.3                       | -7          | 68                  |
| 115.3  | 35.7066         | 100.1692         | 3100             | ChR  | 316.1    | 31.9     | 341.5    | 36.5     | 6  | 6.4  | 231.9                       | -18.5       | 68                  |
| 118.3  | 35.70652        | 100.16921        | 3143             | Cir  | 125      | -67.9    | 212.4    | -61.3    | 13 | 6.2  | 248.7                       | 212.4       | -64                 |
| 120.1  | 35.70669        | 100.16948        | 3129             | ChR  | 199.5    | -51.7    | 219.2    | -23.8    | 4  | 10.4 | 263.1                       | 219.2       | -48                 |
| 121.1  | 35.70675        | 100.16958        | 3133             | Cir  | 68.3     | -49.3    | 97.8     | -67.6    | 12 | 37.8 | 269.8                       | 97.8        | -31                 |
| 122.1  | 35.70675        | 100.16958        | 3133             | Cir  | 73.9     | -53.9    | 178      | -88.5    | 12 | 9.4  | 271.3                       | 178         | -38                 |
| 123.2  | 35.70674        | 100.16956        | 3134             | ChR  | 251.9    | 56.7     | 56.6     | 87.1     | 4  | 1.8  | 273.3                       | 56.6        | 38                  |
| 124.1  | 35.70678        | 100.16958        | 3140             | ChR  | 338.3    | 59.5     | 23.4     | 44.8     | 7  | 12.8 | 277.4                       | 23.4        | 68                  |
| 126.3  | 35.70674        | 100.16976        | 3179             | Cir  | 80.5     | -78.9    | 234      | -72.2    | 12 | 20   | 290.1                       | 234         | -48                 |
| 127.3  | 35.70662        | 100.16972        | 3207             | ChR  | 92.2     | -56.3    | 169.7    | -74.7    | 4  | 4.4  | 293.4                       | 169.7       | -63                 |
| 200.3  | 35.70633        | 100.17165        | 3246             | ChR  | 137.2    | -36.3    | 165      | -37.7    | 4  | 2    | 295.4                       | 165         | -71                 |
| 201.3  | 35.70676        | 100.1723         | 3284             | Cir  | 91.6     | -75      | 209      | -72.1    | 4  | 7.1  | 297                         | 209         | -61                 |
| 204.1  | 35.70694        | 100.17168        | 3075             | ChR  | 292.3    | 54.4     | 345.4    | 60.6     | 7  | 5.4  | 305.3                       | -14.6       | 77                  |
| 205.1  | 35.70691        | 100.17161        | 3118             | Cir  | 137.5    | -46.2    | 170.3    | -40      | 11 | 7.5  | 308.6                       | 170.3       | -75                 |
| 206.2  | 35.70663        | 100.17147        | 3160             | ChR  | 266.5    | 39.1     | 292.7    | 63       | 7  | 3.3  | 311.6                       | -67.3       | 39                  |
| 207.2  | 35.70644        | 100.1715         | 3203             | ChR  | 307.5    | 32.4     | 329.2    | 38       | 8  | 15   | 315.7                       | -30.8       | 60                  |
| 208.2  | 35.7071         | 100.17167        | 3086             | ChR  | 21.6     | 41       | 30.5     | 15.2     | 5  | 14.5 | 317.5                       | 30.5        | 51                  |
| 209.2  | 35.70713        | 100.17167        | 3083             | ChR  | 42.1     | 65.9     | 50.9     | 37.1     | 5  | 11.4 | 319.7                       | 50.9        | 43                  |
| 210.1  | 35.70718        | 100.17167        | 3083             | ChR  | 276.5    | 75.4     | 30.6     | 71.6     | 6  | 7.9  | 322.8                       | 30.6        | 60                  |
| 211.2  | 35.70713        | 100.17167        | 3125             | Cir  | 126.4    | -40.7    | 154.4    | -38.7    | 13 | 8.3  | 328.7                       | 154.4       | -64                 |



|       |          |           |      |     |       |       |       |       |    |      |       |       |     |
|-------|----------|-----------|------|-----|-------|-------|-------|-------|----|------|-------|-------|-----|
| 212.1 | 35.70714 | 100.17166 | 3125 | Cir | 160.1 | -62.8 | 196.3 | -42.8 | 15 | 20.6 | 332.2 | 196.3 | -73 |
| 213.2 | 35.70718 | 100.17186 | 3166 | Cir | 102.1 | -57.5 | 151.8 | -69.3 | 14 | 11   | 335.6 | 151.8 | -63 |
| 214.1 | 35.70718 | 100.17184 | 3166 | Cir | 73.5  | -56   | 104   | -80   | 16 | 11.9 | 337.7 | 104   | -37 |
| 215.3 | 35.70719 | 100.17183 | 3116 | Cir | 139.5 | -55.4 | 176   | -52.1 | 12 | 8    | 340   | 176   | -86 |
| 216.4 | 35.7073  | 100.17175 | 3106 | ChR | 295.2 | 50.4  | 331.4 | 58.9  | 13 | 3.7  | 342   | -28.6 | 67  |
| 217.1 | 35.70736 | 100.17171 | 3103 | ChR | 208.8 | -47.6 | 217.8 | -24.4 | 4  | 7.6  | 346.7 | 217.8 | -49 |
| 218.2 | 35.70736 | 100.17177 | 3109 | Cir | 146.3 | -30.9 | 166   | -27   | 10 | 7.6  | 349.6 | 166   | -66 |
| 219.3 | 35.70736 | 100.17182 | 3103 | Cir | 187.8 | -82.3 | 228.7 | -52.6 | 11 | 8.7  | 353.1 | 228.7 | -50 |
| 220.1 | 35.7073  | 100.17186 | 3127 | Cir | 143.6 | -50   | 177.5 | -40.8 | 9  | 13.8 | 356.4 | 177.5 | -78 |
| 221.3 | 35.70735 | 100.17172 | 3137 | Cir | 120.8 | -58   | 161.2 | -57.6 | 12 | 19.4 | 359.2 | 161.2 | -75 |
| 222.1 | 35.70737 | 100.17174 | 3132 | Cir | 124   | -44.4 | 155.1 | -43   | 11 | 15   | 362.9 | 155.1 | -66 |
| 223.3 | 35.70749 | 100.17183 | 3115 | Cir | 190   | -75.2 | 218.5 | -46.3 | 11 | 10   | 365.8 | 218.5 | -57 |
| 224.2 | 35.70732 | 100.17184 | 3155 | Cir | 68.2  | -9.4  | 73.9  | -40.6 | 4  | 23.2 | 381.4 | 73.9  | -1  |
| 225.1 | 35.7076  | 100.17169 | 3183 | Cir | 197.1 | -75.7 | 218.1 | -46.6 | 14 | 8.8  | 386   | 218.1 | -57 |
| 226.4 | 35.70766 | 100.17172 | 3183 | Ch2 | 35.6  | 74.6  | 39.3  | 36.5  | 5  | 4.3  | 388.4 | 39.3  | 53  |
| 228.1 | 35.70818 | 100.1719  | 3219 | ChR | 26.1  | 76.2  | 36.6  | 38.4  | 4  | 5.2  | 395.6 | 36.6  | 55  |
| 228.3 | 35.70774 | 100.17165 | 3142 | ChR | 219.7 | 47.9  | 207.5 | 85.9  | 3  | 1.2  | 395.6 | 207.5 | 28  |
| 229.4 | 35.70776 | 100.17148 | 3171 | ChR | 96.1  | 74.7  | 55.2  | 40.7  | 4  | 3.5  | 398.5 | 55.2  | 41  |
| 230.2 | 35.70737 | 100.17157 | 3191 | ChR | 121.6 | -61.2 | 174.3 | -42.5 | 5  | 5.1  | 401   | 174.3 | -79 |
| 232.3 | 35.70768 | 100.17152 | 3182 | ChR | 314.2 | 13    | 319.4 | 0.6   | 4  | 7.3  | 406.4 | -40.6 | 39  |
| 233.1 | 35.70782 | 100.17159 | 3170 | ChR | 224.8 | 59    | 0.3   | 74.9  | 4  | 3.5  | 410.1 | 0.3   | 63  |
| 233.2 | 35.70782 | 100.17159 | 3170 | ChR | 94.1  | 44    | 72.6  | 16.7  | 6  | 6.9  | 410.1 | 72.6  | 19  |
| 234.1 | 35.70786 | 100.17159 | 3171 | Cir | 153.7 | -44.8 | 169.1 | -14.5 | 5  | 2.2  | 414.2 | 169.1 | -61 |
| 234.3 | 35.70786 | 100.17159 | 3171 | Cir | 278.3 | -72.5 | 230.2 | -54.7 | 11 | 12.6 | 414.2 | 230.2 | -49 |
| 235.1 | 35.7079  | 100.17162 | 3166 | Cir | 108.9 | -27.6 | 128.7 | -47.6 | 10 | 8.5  | 416.9 | 128.7 | -46 |
| 236.3 | 35.70793 | 100.17182 | 3164 | ChR | 328   | 63.3  | 1.8   | 31.5  | 4  | 4.9  | 422.2 | 1.8   | 72  |
| 237.3 | 35.70805 | 100.17183 | 3162 | ChR | 9.9   | 83.1  | 26.6  | 42.7  | 4  | 6.6  | 426.6 | 26.6  | 65  |
| 301.2 | 35.70813 | 100.17735 | 3024 | ChR | 266.2 | 67.7  | 353.8 | 64    | 5  | 8    | 428.4 | -6.2  | 78  |
| 302.2 | 35.70826 | 100.17724 | 3000 | ChR | 250.9 | 62.8  | 345.2 | 70.5  | 4  | 7.2  | 431.3 | -14.8 | 68  |
| 238.3 | 35.70801 | 100.17187 | 3162 | ChR | 293.8 | 42.3  | 326.7 | 34.9  | 4  | 8.8  | 434.2 | -33.3 | 57  |
| 239.2 | 37.70808 | 100.17186 | 3165 | ChR | 302.8 | 65.8  | 355.6 | 44.9  | 5  | 5.9  | 436   | -4.4  | 81  |
| 303.1 | 35.70832 | 100.17708 | 2995 | ChR | 341.8 | 28.2  | 350.6 | 4.4   | 3  | 6.5  | 436.5 | -9.4  | 56  |
| 303.4 | 35.70832 | 100.17708 | 2995 | ChR | 51.7  | 62.8  | 44.7  | 26.1  | 5  | 6.2  | 436.5 | 44.7  | 45  |
| 240.1 | 35.70776 | 100.17172 | 3190 | ChR | 24.2  | 82.5  | 30.1  | 45.2  | 4  | 5.6  | 439.1 | 30.1  | 63  |

|       |          |           |      |     |       |       |       |       |    |      |       |       |     |
|-------|----------|-----------|------|-----|-------|-------|-------|-------|----|------|-------|-------|-----|
| 304.4 | 35.70831 | 100.1771  | 3009 | ChR | 279.2 | 22.5  | 297   | 33.9  | 7  | 7.5  | 439.1 | -63   | 32  |
| 305.1 | 35.7083  | 100.17691 | 3029 | ChR | 75.8  | 73    | 51.9  | 41.6  | 6  | 9.2  | 442.2 | 51.9  | 44  |
| 241.3 | 35.70804 | 100.17197 | 3173 | ChR | 105.8 | 70.4  | 58.9  | 44.8  | 4  | 5.9  | 445.7 | 58.9  | 39  |
| 306.2 | 35.70822 | 100.17702 | 3016 | ChR | 309.3 | 74    | 10.5  | 53.5  | 4  | 3.3  | 445.8 | 10.5  | 81  |
| 307.4 | 35.70838 | 100.17713 | 3006 | ChR | 291.5 | 71.6  | 5.2   | 57.1  | 4  | 3.8  | 447.2 | 5.2   | 85  |
| 242.4 | 35.70808 | 100.17198 | 3173 | ChR | 112.7 | -40.8 | 142.6 | -37.4 | 3  | 10   | 448.6 | 142.6 | -54 |
| 243.3 | 35.70807 | 100.17197 | 3181 | Cir | 128.8 | -41.3 | 150.3 | -38.5 | 10 | 5.6  | 451.1 | 150.3 | -61 |
| 244.2 | 35.70807 | 100.1721  | 3179 | ChR | 131.8 | -32.5 | 148.9 | -22.5 | 7  | 10.7 | 454   | 148.9 | -53 |
| 309.2 | 35.70359 | 100.17695 | 3027 | ChR | 264.9 | 61.6  | 344.4 | 66.1  | 4  | 7.3  | 454.3 | -15.6 | 72  |
| 310.1 | 35.70863 | 100.17699 | 3030 | ChR | 299.4 | 75.5  | 15.5  | 55.3  | 6  | 10.9 | 458.7 | 15.5  | 77  |
| 311.1 | 35.70868 | 100.17662 | 3027 | ChR | 269.1 | 46.8  | 317.8 | 59.8  | 8  | 9.4  | 459.8 | -42.2 | 57  |
| 245.1 | 35.70815 | 100.17206 | 3183 | ChR | 310.4 | 64.3  | 355.1 | 47.2  | 6  | 4.1  | 464.5 | -4.9  | 82  |
| 314.2 | 35.70883 | 100.17649 | 3033 | ChR | 346.9 | 65.9  | 15.1  | 39.2  | 4  | 13.7 | 466.2 | 15.1  | 72  |
| 315.2 | 35.70887 | 100.17646 | 3036 | ChR | 279.3 | 44.2  | 315.5 | 51.8  | 5  | 5.9  | 471   | -44.5 | 53  |
| 316.2 | 35.70891 | 100.1764  | 3042 | ChR | 284.6 | 69.5  | 358.5 | 60.6  | 4  | 9.8  | 476.2 | -1.5  | 83  |
| 317.3 | 35.70893 | 100.17638 | 3043 | ChR | 317.9 | 50.8  | 346.9 | 36.9  | 4  | 4.4  | 478.4 | -13.1 | 72  |
| 402.3 | 35.70826 | 100.17846 | 3006 | ChR | 342.7 | 43.6  | 354.9 | 23.3  | 6  | 5.3  | 480.7 | -5.1  | 67  |
| 403.1 | 35.70833 | 100.17845 | 3004 | Cir | 110.2 | -72   | 185.2 | -59   | 10 | 4.7  | 485.8 | 185.2 | -84 |
| 404.1 | 35.70834 | 100.17848 | 3008 | Cir | 137.8 | -46.3 | 157.7 | -34.9 | 12 | 11.7 | 489.3 | 157.7 | -65 |
| 319.4 | 35.7091  | 100.17634 | 3046 | Cir | 65.2  | -64.7 | 178.9 | -76.8 | 12 | 10.9 | 489.6 | 178.9 | -60 |
| 320.4 | 35.70899 | 100.17615 | 3072 | Cir | 146.7 | -50.1 | 170.1 | -32.6 | 10 | 9.5  | 491   | 170.1 | -71 |
| 321.2 | 35.70898 | 100.17609 | 3081 | ChR | 110.6 | -3.7  | 113.7 | -9.1  | 7  | 11.7 | 492   | 113.7 | -22 |
| 405.3 | 35.70845 | 100.17865 | 3012 | ChR | 270.8 | 51    | 313.1 | 56.7  | 4  | 2.7  | 493.4 | -46.9 | 52  |
| 406.2 | 35.7084  | 100.17849 | 3014 | ChR | 4.4   | 61.3  | 17.7  | 32.4  | 5  | 9.8  | 496   | 17.7  | 67  |
| 407.3 | 35.70851 | 100.17833 | 3015 | ChR | 274.7 | 53.9  | 324.1 | 57.4  | 5  | 5.3  | 499.2 | -35.9 | 61  |
| 408.1 | 35.70843 | 100.17845 | 3015 | ChR | 24.2  | 31    | 26.1  | -1.3  | 5  | 4.4  | 501.4 | 26.1  | 47  |
| 409.3 | 35.70851 | 100.17843 | 3047 | ChR | 299.1 | 52.6  | 339.9 | 45.8  | 6  | 10.5 | 507.1 | -20.1 | 71  |
| 410.3 | 35.70855 | 100.17846 | 3033 | Cir | 154.2 | -68.9 | 191   | -47.2 | 10 | 2.2  | 511.3 | 191   | -79 |
| 412.2 | 35.70867 | 100.17845 | 3019 | ChR | 278.5 | 51.4  | 330.6 | 58    | 8  | 12.9 | 518.9 | -29.4 | 66  |
| 413.4 | 35.70881 | 100.17821 | 3032 | ChR | 282.2 | 55.2  | 339.4 | 58.2  | 5  | 5.7  | 526.3 | -20.6 | 73  |
| 414.1 | 35.70881 | 100.17824 | 3035 | ChR | 291.4 | 55.9  | 345.8 | 54.9  | 4  | 3.6  | 530   | -14.2 | 78  |
| 415.2 | 35.70894 | 100.17824 | 3042 | Cir | 3.3   | -63.7 | 284.9 | -72   | 11 | 12.3 | 533.1 | -75.1 | -21 |
| 415.3 | 35.70894 | 100.17824 | 3042 | Cir | 92.2  | -61.5 | 167.3 | -65.5 | 10 | 9.4  | 533.1 | 167.3 | -74 |
| 416.3 | 35.70895 | 100.17819 | 3036 | Cir | 352.2 | -45.2 | 328.2 | -60   | 10 | 10.1 | 537   | -31.8 | 9   |

|       |          |           |      |     |       |       |       |       |    |      |       |       |     |
|-------|----------|-----------|------|-----|-------|-------|-------|-------|----|------|-------|-------|-----|
| 416.2 | 35.70895 | 100.17819 | 3036 | ChR | 272.2 | 13.6  | 284.7 | 35.4  | 3  | 9.5  | 537   | -75.3 | 23  |
| 417.2 | 35.7089  | 100.17815 | 3033 | ChR | 93.2  | 82.4  | 55.6  | 50.4  | 5  | 9.9  | 539.9 | 55.6  | 44  |
| 418.1 | 35.70893 | 100.17823 | 3036 | ChR | 334.3 | 48.9  | 359.4 | 30.6  | 6  | 3.7  | 542.4 | -0.6  | 71  |
| 500.1 | 35.709   | 100.17889 | 3030 | ChR | 237.5 | 74.7  | 31.6  | 70.5  | 4  | 6.2  | 544.4 | 31.6  | 61  |
| 501.3 | 35.70902 | 100.17885 | 3026 | Cir | 133   | -72.5 | 190   | -53.3 | 10 | 6.9  | 546.6 | 190   | -82 |
| 419.2 | 35.70899 | 100.17823 | 3046 | Cir | 136   | -44.9 | 163.3 | -38.8 | 10 | 10   | 546.7 | 163.3 | -70 |
| 502.4 | 35.709   | 100.17832 | 3022 | Cir | 175.4 | -84.2 | 212.5 | -55.4 | 10 | 7.5  | 549.3 | 212.5 | -64 |
| 502.2 | 35.709   | 100.17832 | 3022 | ChR | 230.4 | -68.3 | 225.2 | -35.5 | 7  | 11.9 | 549.3 | 225.2 | -47 |
| 503   | 35.70906 | 100.17882 | 3026 | Cir | 98    | -46.2 | 139.1 | -58.2 | 6  | 8.3  | 552.9 | 139.1 | -57 |
| 504.1 | 35.70807 | 100.1788  | 3030 | ChR | 344.5 | 32.1  | 354.7 | 12.6  | 6  | 32   | 555.7 | -5.3  | 61  |
| 504.4 | 35.70807 | 100.1788  | 3030 | ChR | 244.7 | 51.1  | 290.8 | 74.4  | 5  | 1.4  | 555.7 | -69.2 | 40  |
| 505.3 | 35.709   | 100.17879 | 3034 | ChR | 266.2 | 45.5  | 303   | 59.9  | 4  | 7.8  | 558.1 | -57   | 45  |
| 506.4 | 35.70911 | 100.17877 | 3042 | Cir | 150.1 | -57.2 | 178.6 | -41.3 | 9  | 9.9  | 560.1 | 178.6 | -79 |
| 507.3 | 35.70921 | 100.17874 | 3044 | ChR | 185.2 | 73.2  | 79    | 73.3  | 8  | 2.8  | 562.9 | 79    | 35  |
| 507.4 | 35.70921 | 100.17874 | 3044 | ChR | 270.3 | 24.1  | 284.4 | 39.8  | 6  | 12.5 | 562.9 | -75.6 | 24  |
| 508.4 | 35.70913 | 100.17871 | 3054 | ChR | 304.9 | 63.5  | 350.2 | 56.3  | 8  | 5.5  | 565.9 | -9.8  | 82  |
| 509.1 | 35.70918 | 100.17867 | 3055 | ChR | 281.7 | 42.1  | 305.9 | 51.1  | 9  | 2.3  | 570.7 | -54.1 | 45  |
| 600.2 | 35.70852 | 100.18083 | 3056 | ChR | 303.9 | 46.6  | 328.3 | 48.5  | 9  | 3.6  | 571   | -31.7 | 63  |
| 700.4 | 35.70847 | 100.18449 | 2946 | ChR | 187.8 | -49   | 205.2 | -29.7 | 11 | 3.4  | 571.1 | 205.2 | -60 |
| 701.4 | 35.70858 | 100.18441 | 2954 | Cir | 127.6 | -51.1 | 166.5 | -53.5 | 11 | 8.8  | 575.1 | 166.5 | -79 |
| 701.2 | 35.70858 | 100.18441 | 2954 | Cir | 27.7  | -68.5 | 300.8 | -75.2 | 11 | 14.1 | 575.1 | -59.2 | -18 |
| 601.3 | 35.70866 | 100.18086 | 3048 | Cir | 157.8 | -66   | 195.4 | -46.7 | 10 | 11.5 | 575.6 | 195.4 | -75 |
| 702.2 | 35.70875 | 100.18439 | 2953 | Cir | 70.1  | -56.8 | 102.7 | -86.2 | 12 | 11.6 | 577.9 | 102.7 | -36 |
| 702.4 | 35.70875 | 100.18439 | 2953 | Cir | 84.3  | -54   | 133   | -78.5 | 11 | 5.8  | 577.9 | 133   | -48 |
| 511.4 | 35.70925 | 100.17861 | 3067 | ChR | 72.8  | 71.9  | 59.3  | 50.9  | 9  | 6.8  | 578   | 59.3  | 41  |
| 512.1 | 35.70926 | 100.1785  | 3069 | ChR | 49.6  | 56.9  | 49.4  | 35.9  | 8  | 8.9  | 579.1 | 49.4  | 44  |
| 703.1 | 35.70889 | 100.18434 | 2954 | ChR | 329.3 | 40.4  | 354.6 | 38.3  | 3  | 3.4  | 580.9 | -5.4  | 76  |
| 703.3 | 35.70889 | 100.18434 | 2954 | ChR | 322.3 | 55.3  | 4.8   | 52.1  | 4  | 6.5  | 580.9 | 4.8   | 85  |
| 602.3 | 35.70864 | 100.18067 | 3048 | ChR | 310.5 | 84.6  | 39.3  | 68.6  | 10 | 8.5  | 581.4 | 39.3  | 57  |
| 704.3 | 35.70896 | 100.18431 | 2955 | ChR | 210.2 | -40   | 218.8 | -15.6 | 3  | 6.2  | 587.3 | 218.8 | -45 |
| 800.1 | 35.70832 | 100.18418 | 2979 | ChR | 356.3 | 27.1  | 6.8   | 15.2  | 4  | 10.7 | 588.3 | 6.8   | 62  |
| 800.2 | 35.70832 | 100.18418 | 2979 | ChR | 51.3  | 79.5  | 63.3  | 50.8  | 5  | 10.9 | 588.3 | 63.3  | 38  |
| 705.1 | 35.70914 | 100.18427 | 2954 | ChR | 359.1 | 32.7  | 11.9  | 19    | 3  | 10.9 | 590.2 | 11.9  | 63  |
| 605.2 | 35.70898 | 100.18083 | 3023 | Cir | 198.9 | -70.3 | 218.9 | -48.4 | 13 | 11.4 | 590.7 | 218.9 | -57 |

|       |          |           |      |     |       |       |       |       |    |      |       |       |     |
|-------|----------|-----------|------|-----|-------|-------|-------|-------|----|------|-------|-------|-----|
| 801.1 | 35.70836 | 100.18574 | 2949 | Cir | 114.5 | -58.1 | 171.7 | -66.8 | 9  | 6    | 590.8 | 171.7 | -74 |
| 801.4 | 35.70836 | 100.18574 | 2949 | ChR | 138   | -19.8 | 150.5 | -26.9 | 5  | 3.8  | 590.8 | 150.5 | -56 |
| 606.2 | 35.70903 | 100.18083 | 3023 | Cir | 117.9 | -35.8 | 142.5 | -37.3 | 11 | 5.7  | 593.7 | 142.5 | -54 |
| 706.4 | 35.70925 | 100.1842  | 2953 | ChR | 262.9 | 42.6  | 280.7 | 69.6  | 3  | 7.1  | 594.3 | -79.3 | 33  |
| 802.3 | 35.70844 | 100.18574 | 2952 | ChR | 301.7 | 85.1  | 59.2  | 63.6  | 5  | 13   | 594.7 | 59.2  | 45  |
| 607.2 | 35.70909 | 100.18083 | 3023 | ChR | 329.1 | 68.8  | 18.8  | 57.5  | 5  | 3.7  | 596.3 | 18.8  | 75  |
| 803.3 | 35.70844 | 100.18578 | 2948 | ChR | 220.9 | 70    | 107.6 | 75.8  | 5  | 3.8  | 599.7 | 107.6 | 24  |
| 707.3 | 35.70935 | 100.1842  | 2979 | ChR | 269.7 | 41.1  | 291.4 | 66.1  | 4  | 5.3  | 600.5 | -68.6 | 39  |
| 804.2 | 35.70859 | 100.1858  | 2965 | ChR | 346   | 65.4  | 28    | 50.1  | 3  | 4.9  | 601.6 | 28    | 66  |
| 804.3 | 35.70859 | 100.1858  | 2965 | ChR | 198.9 | 78.2  | 91.5  | 66.9  | 4  | 5.1  | 601.6 | 91.5  | 25  |
| 805.1 | 35.70858 | 100.18586 | 2964 | ChR | 300.9 | 47.6  | 338.2 | 57.5  | 5  | 13.3 | 604.9 | -21.8 | 72  |
| 708.4 | 35.70934 | 100.18418 | 2979 | ChR | 246.9 | -39.4 | 247.1 | -10.4 | 4  | 5.6  | 605   | 247.1 | -22 |
| 806.2 | 35.7086  | 100.18585 | 2965 | ChR | 86.1  | -61.7 | 170.6 | -81.3 | 4  | 5.4  | 608.8 | 170.6 | -52 |
| 808.4 | 35.70855 | 100.18591 | 2977 | Cir | 147.6 | -61.7 | 195.4 | -51   | 12 | 10.4 | 614.6 | 195.4 | -77 |
| 809.1 | 35.70856 | 100.18591 | 2985 | Cir | 119.3 | -58.2 | 159.2 | -59   | 8  | 8.4  | 617.3 | 159.2 | -73 |
| 810.2 | 35.70855 | 100.18595 | 2983 | ChR | 253.8 | -38.2 | 251.2 | -12.7 | 3  | 7.3  | 621.8 | 251.2 | -19 |
| 811.2 | 35.70866 | 100.18598 | 2982 | Cir | 90.4  | -34.2 | 108.6 | -51.4 | 11 | 35.7 | 626.3 | 108.6 | -32 |
| 813.4 | 35.70869 | 100.18599 | 2987 | Cir | 71.6  | -41.4 | 89.4  | -60.3 | 10 | 10.6 | 632.5 | 89.4  | -22 |
| 814.1 | 35.7087  | 100.18599 | 2994 | Cir | 94.6  | -48.9 | 126.4 | -60.1 | 4  | 15.5 | 635.5 | 126.4 | -48 |
| 815.2 | 35.70875 | 100.18604 | 2990 | CiR | 121.4 | -39.7 | 142.5 | -42.3 | 2  | 0    | 641.5 | 142.5 | -56 |
| 816.2 | 35.70876 | 100.18607 | 2993 | Cir | 92.5  | -29.3 | 107   | -41.8 | 11 | 9.4  | 645.1 | 107   | -27 |
| 817.2 | 35.70881 | 100.18618 | 3002 | ChR | 152   | -35.9 | 164.1 | -24.9 | 4  | 12.2 | 649.3 | 164.1 | -64 |
| 818.3 | 35.7089  | 100.18669 | 2979 | Cir | 102.4 | -56.6 | 138.2 | -59.4 | 10 | 17.7 | 653.5 | 138.2 | -57 |
| 819.1 | 35.70898 | 100.18663 | 2983 | ChR | 318.2 | 25    | 326.1 | 18    | 10 | 3.3  | 656.4 | -33.9 | 50  |
| 820.1 | 35.70898 | 100.18665 | 2988 | ChR | 284.3 | 62.2  | 322.3 | 60.9  | 4  | 11.9 | 659.6 | -37.7 | 60  |
| 821.2 | 35.70902 | 100.18661 | 3001 | ChR | 296.2 | 53.6  | 321.5 | 49.7  | 7  | 1.3  | 662.4 | -38.5 | 58  |
| 822.1 | 35.70905 | 100.18659 | 2995 | ChR | 316.2 | 52.8  | 335.8 | 42.9  | 5  | 4.7  | 664.3 | -24.2 | 67  |
| 823.2 | 35.70903 | 100.1865  | 2990 | ChR | 100   | -30.5 | 112.6 | -33.6 | 6  | 5.6  | 666.9 | 112.6 | -29 |
| 824.1 | 35.7091  | 100.18651 | 2997 | ChR | 115.3 | -31.7 | 127   | -28.8 | 6  | 14.6 | 668.8 | 127   | -39 |
| 826.3 | 35.70904 | 100.18638 | 3005 | Cir | 136.7 | -44.9 | 154.4 | -30.6 | 10 | 28.3 | 675.8 | 154.4 | -61 |
| 827.3 | 35.7092  | 100.18619 | 3002 | ChR | 97.7  | -28.1 | 110.4 | -32   | 4  | 9.7  | 679.3 | 110.4 | -26 |
| 828.1 | 35.70924 | 100.18612 | 3003 | Cir | 99.8  | -23.2 | 108   | -31.7 | 8  | 2.8  | 681.6 | 108   | -24 |
| 828.8 | 35.70924 | 100.18612 | 3003 | Cir | 217.8 | -51.3 | 215.9 | -31   | 13 | 5.8  | 681.6 | 215.9 | -53 |
| 829.2 | 35.70982 | 100.18651 | 2983 | Cir | 163.8 | -78.6 | 198.8 | -52.2 | 9  | 9.4  | 685.4 | 198.8 | -74 |

|        |          |            |      |     |       |       |       |       |    |      |       |       |     |
|--------|----------|------------|------|-----|-------|-------|-------|-------|----|------|-------|-------|-----|
| 901.2  | 35.7103  | 100.18879  | 2917 | ChR | 263.7 | 60.2  | 323.4 | 67.8  | 8  | 7    | 685.5 | -36.6 | 59  |
| 830.1  | 35.70988 | 100.18643  | 2988 | ChR | 314.9 | 26    | 324.5 | 17.4  | 7  | 6.2  | 686   | -35.5 | 48  |
| 830.4  | 35.70988 | 100.18643  | 2988 | ChR | 336.8 | 37.4  | 347.2 | 20.4  | 4  | 6.1  | 686   | -12.8 | 63  |
| 831.3  | 35.70986 | 100.18643  | 2993 | ChR | 356.7 | 68.2  | 14.5  | 44.6  | 6  | 5.9  | 686.8 | 14.5  | 75  |
| 902.4  | 35.71033 | 100..18877 | 2921 | Cir | 179.2 | -69.3 | 200.7 | -44.4 | 8  | 8.6  | 687.8 | 200.7 | -70 |
| 904.2  | 35.71038 | 100.18889  | 2923 | ChR | 108.7 | -60.9 | 165.1 | -58.4 | 4  | 8.4  | 695.8 | 165.1 | -77 |
| 905.4  | 35.71028 | 100.18893  | 2914 | Cir | 155.3 | -59.5 | 186.3 | -41.8 | 7  | 10.5 | 698.7 | 186.3 | -78 |
| 906.2  | 35.71044 | 100.18886  | 2929 | ChR | 311   | 27.6  | 327.2 | 24.6  | 12 | 5    | 701.8 | -32.8 | 53  |
| 908.1  | 35.7105  | 100.18882  | 2929 | ChR | 14.9  | 31.4  | 19.4  | 2.6   | 5  | 7.8  | 707.8 | 19.4  | 52  |
| 909.2  | 35.71054 | 100.18873  | 2934 | ChR | 352.4 | 53.9  | 12    | 29.4  | 3  | 11.1 | 710.1 | 12    | 68  |
| 912.4  | 35.71072 | 100.18944  | 2912 | ChR | 277.9 | 39.7  | 309.8 | 51.5  | 4  | 6.8  | 710.3 | -50.2 | 49  |
| 910.1  | 35.71057 | 100.18873  | 2932 | ChR | 245.9 | 83.7  | 38.7  | 63.7  | 6  | 2.5  | 713.1 | 38.7  | 59  |
| 913.2  | 35.71076 | 100.18939  | 2919 | ChR | 0.7   | 41.9  | 11.9  | 16.2  | 6  | 4.4  | 714.3 | 11.9  | 61  |
| 911.3  | 35.7106  | 100.1886   | 2932 | ChR | 279.7 | 24.5  | 298   | 38.5  | 4  | 7.2  | 717.1 | -62   | 35  |
| 914.2  | 35.71079 | 100.1894   | 2926 | Cir | 94.2  | -52.6 | 146.9 | -63.1 | 5  | 6.8  | 717.1 | 146.9 | -63 |
| 915.2  | 35.71087 | 100.18943  | 2926 | ChR | 291.1 | 50.3  | 332.6 | 51.7  | 7  | 9.8  | 720.9 | -27.4 | 67  |
| 916.3  | 35.71088 | 100.18935  | 2926 | ChR | 60.6  | 53.2  | 54.6  | 22    | 4  | 6.1  | 728.2 | 54.6  | 35  |
| 917.4  | 35.71099 | 100.18934  | 2926 | ChR | 274.1 | 23.3  | 291.6 | 40.4  | 5  | 4.8  | 732.7 | -68.4 | 30  |
| 918.1  | 35.71116 | 100.18919  | 2923 | ChR | 172   | -58.7 | 194.5 | -33.7 | 7  | 5    | 737.3 | 194.5 | -69 |
| 919.1  | 35.71132 | 100.18907  | 2923 | ChR | 187.8 | -60.6 | 204   | -31.9 | 4  | 6.1  | 741.5 | 204   | -62 |
| 920.2  | 35.71128 | 100.18908  | 2909 | Cir | 17.4  | -78.9 | 237.1 | -67.4 | 12 | 5.2  | 745.3 | 237.1 | -47 |
| 921.3  | 35.71127 | 100.18904  | 2945 | ChR | 305.2 | 34.3  | 327.2 | 33    | 4  | 9.3  | 752.8 | -32.8 | 56  |
| 922.3  | 35.71127 | 100.18904  | 2946 | ChR | 336.9 | 40.1  | 354.4 | 23.2  | 6  | 5    | 753.8 | -5.6  | 67  |
| 922.4  | 35.71127 | 100.18904  | 2946 | ChR | 353.9 | 39.1  | 6.1   | 16    | 3  | 10.4 | 753.8 | 6.1   | 63  |
| 923.3  | 35.71129 | 100.18916  | 2982 | Cir | 129   | -57.5 | 172.2 | -49.3 | 6  | 5.6  | 755.3 | 172.2 | -82 |
| 924.4  | 35.71126 | 100.18924  | 2976 | ChR | 6.6   | 40.5  | 15.8  | 14.4  | 5  | 4.9  | 761.5 | 15.8  | 59  |
| 925.1  | 35.71128 | 100.18923  | 2975 | ChR | 311.7 | 54.3  | 348.7 | 45.5  | 11 | 3.5  | 767.7 | -11.3 | 77  |
| 1002.2 | 35.71108 | 100.19051  | 2928 | Cir | 141   | -54.6 | 175.4 | -43   | 11 | 12.1 | 772.7 | 175.4 | -79 |
| 925.52 | 35.71139 | 100.18931  | 2968 | ChR | 77.5  | 42.9  | 69.4  | 15.2  | 4  | 9.1  | 775.7 | 69.4  | 21  |
| 926.2  | 35.71143 | 100.18932  | 2965 | ChR | 270.6 | 53.7  | 323.4 | 65.2  | 9  | 7    | 778.4 | -36.6 | 60  |
| 1003.2 | 35.71113 | 100.1905   | 2932 | ChR | 358.6 | 56.6  | 17.3  | 32.4  | 8  | 2.7  | 778.6 | 17.3  | 67  |
| 1006.3 | 35.71137 | 100.19048  | 2952 | ChR | 103.2 | 68.8  | 72.1  | 45    | 4  | 6.8  | 801.9 | 72.1  | 29  |
| 1008.1 | 35.71135 | 100.19041  | 2983 | ChR | 1.2   | 39    | 11.6  | 15.9  | 4  | 6    | 813.1 | 11.6  | 61  |
| 1010   | 35.71166 | 100.19052  | 3000 | ChR | 34.6  | 42.4  | 33.5  | 12.5  | 5  | 3.3  | 822.1 | 33.5  | 48  |

|        |          |           |      |     |       |      |       |      |   |      |       |       |    |
|--------|----------|-----------|------|-----|-------|------|-------|------|---|------|-------|-------|----|
| 1011   | 35.71162 | 100.19055 | 2995 | ChR | 65.9  | 55.9 | 52.1  | 29.3 | 7 | 8.3  | 825.6 | 52.1  | 40 |
| 1012   | 35.71161 | 100.19055 | 2982 | ChR | 43.2  | 36.1 | 43.9  | 6.2  | 6 | 3.4  | 831.4 | 43.9  | 38 |
| 1013.1 | 35.71168 | 100.19056 | 2986 | ChR | 273.9 | 57.7 | 332.1 | 66.3 | 5 | 8.7  | 839.6 | -27.9 | 65 |
| 1013.3 | 35.71168 | 100.19056 | 2986 | ChR | 293.8 | 1.5  | 297.3 | 12.7 | 5 | 4.2  | 839.6 | -62.7 | 26 |
| 1014   | 35.71168 | 100.19057 | 2955 | ChR | 263   | 48.1 | 302.6 | 57.8 | 5 | 13.2 | 841.1 | -57.4 | 45 |

---

TABLE A2. SUPPLEMENTAL PALEOMAGNETIC INFORMATION-UPPER SECTION

| Sample | Latitude<br>(°) | Longitude<br>(°) | Elevation<br>(m) | Type | Dec. (g) | Inc. (g) | Dec. (t) | Inc. (t) | N    | MAD    | Stratigraphic<br>Height (m) | Dec. | VGP<br>Lat. (°) |
|--------|-----------------|------------------|------------------|------|----------|----------|----------|----------|------|--------|-----------------------------|------|-----------------|
| 1.3    | 35.69863        | 100.23183        | 2845             | ChR  | 17.0     | 22.8     | 17.3     | 9.9      | 3    | 19.6   | 0.7                         | 017  | 56              |
| 2.3    | 35.69868        | 100.23187        | 2842             | ChR  | 186.3    | -4.9     | 186.2    | 7.7      | 3    | 10.1   | 3.8                         | 186  | -51             |
| 3.2    | 35.69921        | 100.23197        | 2854             | ChR  | 128.9    | -67.2    | 152.5    | -60.7    | 3    | 6.3    | 22.6                        | 153  | -68             |
| 4.1    | 35.69911        | 100.23186        | 2855             | ChR  | 0.2      | 32.2     | 2.4      | 19.9     | 4    | 7.3    | 35.3                        | 002  | 65              |
| 6.1    | 35.69974        | 100.23226        | 2890             | ChR  | 75.4     | 32.2     | 70.7     | 25.3     | 6    | 20.4   | 54.6                        | 071  | 23              |
| 5.1    | 35.69964        | 100.23212        | 2901             | ChR  | 16.0     | 52.2     | 17.0     | 41.2     | 4    | 15.0   | 59.5                        | 017  | 71              |
| 7.3    | 35.70039        | 100.23247        | 2874             | ChR  | 346.4    | 41.4     | 350.5    | 33.0     | 14   | 3.6    | 70.1                        | -010 | 71              |
| 8.1    | 35.70017        | 100.23277        | 2905             | ChR  | 342.8    | 20.5     | 344.5    | 12.5     | 9    | 11.1   | 75.2                        | -016 | 58              |
| 10.3   | 35.70144        | 100.23299        | 2968             | ChR  | 353.5    | 13.5     | 354.2    | 6.4      | 4    | 9.4    | 99.5                        | -006 | 58              |
| 12.3   | 35.70175        | 100.233561       | -                | ChR  | 108.6    | -17.2    | 110.3    | -15.3    | 6    | 8.3    | 110.0                       | 110  | -21             |
| 11.1   | 35.70163        | 100.23310        | 2910             | ChR  | 1.2      | 40.6     | 1.2      | 33.6     | 4    | 1.8    | 116.4                       | 001  | 73              |
| 14.1   | 35.70225        | 100.23391        | 2981             | ChR  | 92.8     | -54.6    | 101.2    | -54.1    | 5    | 5.7    | 131.8                       | 101  | -27             |
| 18.1   | 35.70255        | 100.23594        | 2900             | Cir  | 162.3    | -43.0    | 163.7    | -38.3    | 7    | 6.8    | 141.5                       | 164  | -70             |
| 19.3   | 35.70290        | 100.23613        | 2900             | Cir  | 165.6    | -27.8    | 166.9    | -23.3    | 8    | 4.5    | 145.1                       | 167  | -64             |
| 20.3   | 35.70295        | 100.23629        | 2938             | ChR  | 59.8     | 52.2     | 54.7     | 49.3     | 4    | 12.0   | 148.0                       | 055  | 44              |
| 21.2   | 35.70310        | 100.23614        | 2917             | ChR  | 11.6     | 23.2     | 11.3     | 18.3     | 6    | 4.9    | 156.1                       | 011  | 62              |
| 22.1   | 35.70312        | 100.23670        | 2926             | ChR  | 311.7    | 80.3     | 325.5    | 77.4     | 4    | 14.7   | 166.4                       | -035 | 53              |
| 23.2   | 35.70334        | 100.23684        | 2931             | Cir  | 145.0    | -38.2    | 148.2    | -34.1    | 6    | 14.3   | 175.9                       | 148  | -57             |
| 24.2   | 35.70338        | 100.23697        | 2937             | ChR  | 300.7    | 60.5     | 306.4    | 58.3     | 4    | 1.2    | 179.8                       | -054 | 48              |
| 25.2   | 35.70326        | 100.23684        | 2930             | Cir  | 146.0    | -45.6    | 147.9    | -41.8    | 3    | 8.5    | 183.8                       | 148  | -60             |
| 26.1   | 35.70380        | 100.23672        | 2948             | Cir  | 154.7    | -60.8    | 160.1    | -57.6    | 5    | 9.6    | 195.4                       | 160  | -74             |
| 27.2   | 35.70380        | 100.23645        | 2988             | Cir  | 201.7    | -28.2    | 199.8    | -23.6    | 4    | 6.5    | 226.5                       | 200  | -61             |
| 30.1   | 35.70500        | 100.239088       | -                | ChR  | 350.8    | 65.6     | 351.5    | 63.6     | 4    | 9.0    | 258.4                       | -009 | 78              |
| 31.1   | 35.70497        | 100.238935       | -                | ChR  | 347.2    | 41.5     | 347.6    | 39.5     | 4    | 3.3    | 261.9                       | -012 | 73              |
| 32.1   | 35.70501        | 100.239348       | -                | ChR  | 189.7    | -48.5    | 189.4    | -46.5    | 3    | 9.6    | 263.4                       | 189  | -79             |
| 33.2   | 35.70506        | 100.239306       | -                | ChR  | 166.3    | -38.0    | 166.8    | -36.1    | 13.2 | -118.0 | 269.0                       | 167  | -71             |
| 34.3   | 35.70576        | 100.23903        | 2992             | ChR  | 181.0    | -47.1    | 181.6    | -45.7    | 10   | 6.6    | 294.0                       | 182  | -82             |
| 35.2   | 35.70669        | 100.23927        | 3030             | Cir  | 159.4    | -50.3    | 163.8    | -46.3    | 11   | 9.3    | 303.8                       | 164  | -74             |
| 36.2   | 35.70652        | 100.25972        | 3051             | ChR  | 146.0    | -30.0    | 146.7    | -29.1    | 6    | 8.8    | 305.3                       | 147  | -54             |
| 38     | 35.70745        | 100.23893        | 3033             | ChR  | 353.7    | 44.0     | 354.3    | 42.7     | 8    | 11.1   | 337.4                       | -006 | 79              |
| 39.1   | 35.70759        | 100.23870        | 3007             | Cir  | 159.6    | -48.7    | 163.2    | -44.1    | 6    | 7.6    | 346.0                       | 163  | -73             |
| 42.3   | 35.70781        | 100.23944        | 3114             | Cir  | 146.7    | -40.5    | 151.6    | -37.8    | 7    | 13.1   | 357.9                       | 152  | -62             |

|    |          |           |   |     |      |      |      |      |   |      |       |     |    |
|----|----------|-----------|---|-----|------|------|------|------|---|------|-------|-----|----|
| 45 | 35.70796 | 100.23941 | - | ChR | 21.0 | 59.4 | 21.0 | 59.4 | 5 | 13.0 | 425.1 | 021 | 73 |
|----|----------|-----------|---|-----|------|------|------|------|---|------|-------|-----|----|

---
